# Supplementary material
Source: publisher figshare collection journal article supplement (https://gsapubs.figshare.com/ndownloader/files/22411407)
Supplement: Supplementary file 3 [file 22411407]

Archive with 3 entries (3 files):
- Spinelli_etal_ST2B _11July2018.pdf
- Spinelli_etal_ST2B _11July2018_SupplementaryInfo.pdf
- Spinelli_etal_ST2B_Supplementary_Figs_July2018.pdf
