# Supplementary material
Source: publisher figshare collection journal article supplement (https://gsapubs.figshare.com/ndownloader/files/22411407)

Figure S1

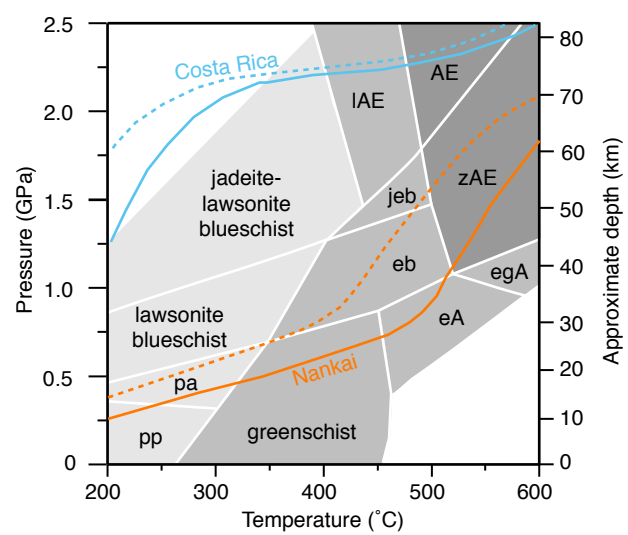

Figure S2

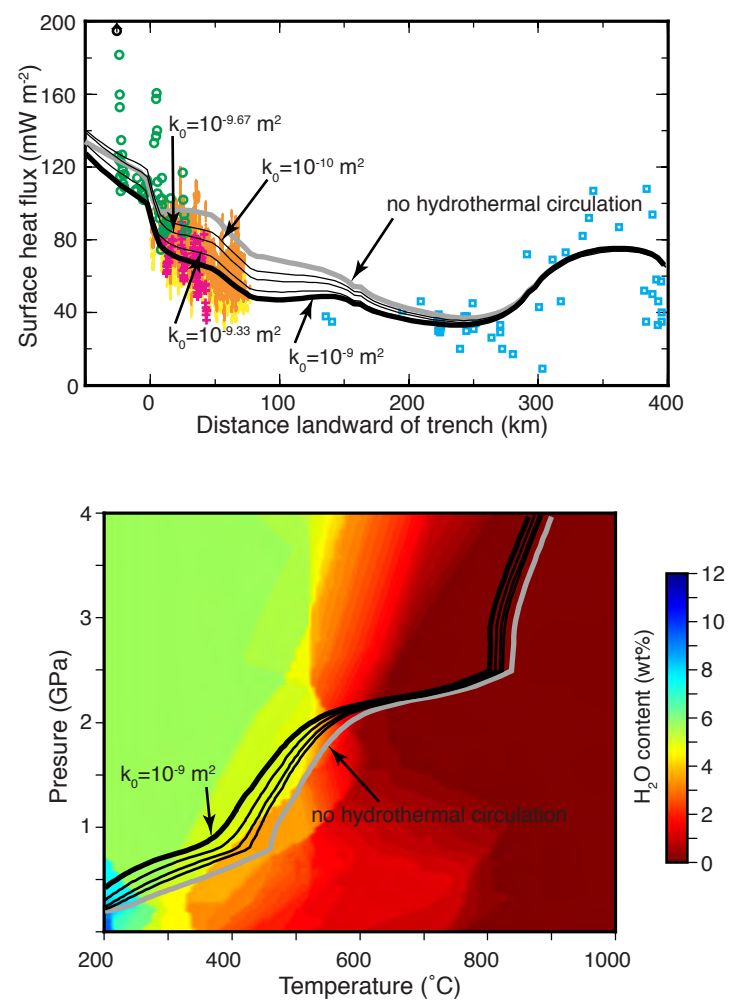

Figure S3

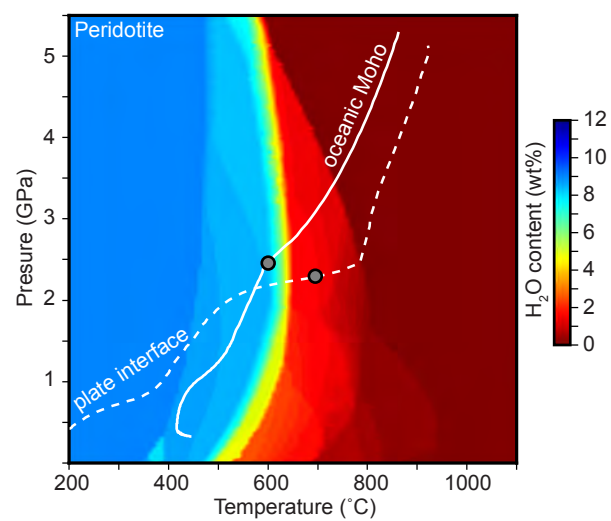

Supplement: Supplementary file 2 [file 22411407]
